# Supplementary material for: What Are the Effects of Self-Regulation Phases and Strategies for Chinese Students? A Meta-Analysis of Two Decades Research of the Association Between Self-Regulation and Academic Performance
Source: PubMed Central journal article supplement (PMC6305361; doi:10.3389/fpsyg.2018.02434), 2018-12-18
Supplement: Data_Sheet_1.pdf [file Data_Sheet_1.pdf]

## Appendix

Table A.1 Summary of coding information of the 55 cross-sectional studies and 4 intervention studies.

| Independent sample ID                 | Publication year | SRL Phases  | SRL strategies           | Discipline | Educational stage | Correlation | Sample size | Percentage of female |
|---------------------------------------|------------------|-------------|--------------------------|------------|-------------------|-------------|-------------|----------------------|
| <b>Cross-sectional Studies</b>        |                  |             |                          |            |                   |             |             |                      |
| An, M., & Yu, J.Y_1                   | 2009             | Performance | Metacognitive_monitoring | Integrated | Junior_Senior     | 0.158       | 910         | 35.78                |
| An, M., & Yu, J.Y_2                   | 2009             | Performance | Metacognitive_monitoring | Integrated | Senior            | 0.101       | 482         | NA                   |
| An, M., & Yu, J.Y_3                   | 2009             | Performance | Metacognitive_monitoring | Integrated | Junior            | 0.271       | 428         | NA                   |
| An, M., & Yu, J.Y_4                   | 2009             | Performance | Metacognitive_monitoring | Language   | Junior_Senior     | 0.172       | 910         | 35.78                |
| An, M., & Yu, J.Y_5                   | 2009             | Performance | Metacognitive_monitoring | Science    | Junior_Senior     | 0.154       | 910         | 35.78                |
| An, M., & Yu, J.Y_6                   | 2009             | Performance | Metacognitive_monitoring | Language   | Junior_Senior     | 0.111       | 910         | 35.78                |
| Cao, L. R., & Cao, X. H_1             | 2004             | Forethought | Self-efficacy            | Language   | Senior            | 0.201       | 123         | 46.34                |
| Cao, L. R., & Cao, X. H_2             | 2004             | Performance | Metacognitive_monitoring | Language   | Senior            | 0.057       | 123         | 46.34                |
| Cao, L. R., & Cao, X. H_3             | 2004             | Forethought | Task_interest/value      | Language   | Senior            | -0.208      | 123         | 46.34                |
| Cao, L. R., & Cao, X. H_4             | 2004             | Forethought | Self-efficacy            | Language   | Senior            | 0.289       | 123         | 46.34                |
| Cao, L. R., & Cao, X. H_5             | 2004             | Performance | Metacognitive_monitoring | Language   | Senior            | 0.241       | 123         | 46.34                |
| Cao, L. R., & Cao, X. H_6             | 2004             | Forethought | Task_interest/value      | Language   | Senior            | -0.193      | 123         | 46.34                |
| Cao, L. R., & Cao, X. H_7             | 2004             | Forethought | Self-efficacy            | Science    | Senior            | 0.37        | 123         | 46.34                |
| Cao, L. R., & Cao, X. H_8             | 2004             | Performance | Metacognitive_monitoring | Science    | Senior            | 0.221       | 123         | 46.34                |
| Cao, L. R., & Cao, X. H_9             | 2004             | Forethought | Task_interest/value      | Science    | Senior            | -0.15       | 123         | 46.34                |
| Chang, H. Q., & Pan, Y_1              | 2013             | Forethought | Self-efficacy            | Integrated | Junior_Senior     | 0.08        | 183         | 53.01                |
| Chang, H. Q., & Pan, Y_2              | 2013             | Performance | Metacognitive_monitoring | Integrated | Junior_Senior     | 0.37        | 183         | 53.01                |
| Chang, H. Q., & Pan, Y_3              | 2013             | Forethought | Task_interest/value      | Integrated | Junior_Senior     | 0.35        | 183         | 53.01                |
| Chen, C., Gong, S. Y., & Chai, X. Y_1 | 2013             | Forethought | Goal_orientation         | Science    | Junior_Senior     | -0.14       | 888         | 43.81                |
| Chen, C., Gong, S. Y., & Chai, X. Y_2 | 2013             | Forethought | Goal_orientation         | Science    | Junior_Senior     | 0.06        | 888         | 43.81                |
| Chen, C., Gong, S. Y., & Chai, X. Y_3 | 2013             | Forethought | Goal_orientation         | Science    | Junior_Senior     | -0.13       | 888         | 43.81                |
| Chen, C., Gong, S. Y., & Chai, X. Y_4 | 2013             | Forethought | Goal_orientation         | Science    | Junior_Senior     | 0.05        | 888         | 43.81                |
| Chen, C., Gong, S. Y., & Chai, X. Y_5 | 2013             | Forethought | Goal_orientation         | Science    | Junior_Senior     | 0.01        | 888         | 43.81                |
| Chen, C., Gong, S. Y., & Chai, X. Y_6 | 2013             | Forethought | Goal_orientation         | Science    | Junior_Senior     | 0.12        | 888         | 43.81                |

| Independent sample ID              | Publication year | SRL Phases  | SRL strategies           | Discipline | Educational stage | Correlation | Sample size | Percentage of female |
|------------------------------------|------------------|-------------|--------------------------|------------|-------------------|-------------|-------------|----------------------|
| Chen, J. J., & Li, S. F_1          | 2012             | Reflection  | Self-satisfaction/affect | Integrated | Junior            | -0.319      | 364         | 45.329               |
| Chen, J. J., & Li, S. F_2          | 2012             | Reflection  | Self-satisfaction/affect | Integrated | Junior            | 0.425       | 364         | 45.329               |
| Chen, J. J., & Li, S. F_3          | 2012             | Reflection  | Attribution              | Integrated | Junior            | 0.273       | 364         | 45.329               |
| Chen, J_1                          | 2009             | Forethought | Goal_orientation         | Integrated | Senior            | 0.068       | 235         | 46                   |
| Chen, J_2                          | 2009             | Forethought | Goal_orientation         | Integrated | Senior            | -0.063      | 235         | 46                   |
| Chen, J_3                          | 2009             | Forethought | Goal_orientation         | Integrated | Senior            | 0.283       | 235         | 46                   |
| Chen, J_4                          | 2009             | Forethought | Goal_orientation         | Integrated | Senior            | 0.127       | 235         | 46                   |
| Chen, L. J_1                       | 2011             | Pooled      | Integrated               | Integrated | Senior            | 0.273       | 534         | NA                   |
| Chen, L. J_2                       | 2011             | Forethought | Self-efficacy            | Integrated | Senior            | 0.374       | 534         | NA                   |
| Chen, L. J_3                       | 2011             | Forethought | Self-efficacy            | Integrated | Senior            | 0.149       | 534         | NA                   |
| Chen, L. J_4                       | 2011             | Forethought | Goal_orientation         | Integrated | Senior            | 0.012       | 534         | NA                   |
| Chen, L. J_5                       | 2011             | Forethought | Goal_orientation         | Integrated | Senior            | -0.156      | 534         | NA                   |
| Chen, L. J_6                       | 2011             | Forethought | Goal_orientation         | Integrated | Senior            | 0.15        | 534         | NA                   |
| Chen, M. G., & Hu, Z. B_1          | 2008             | Performance | Task_strategies          | Integrated | Senior            | 0.19        | 270         | 51.48                |
| Chen, M. G., & Hu, Z. B_2          | 2008             | Performance | Task_strategies          | Integrated | Senior            | 0.17        | 270         | 51.48                |
| Chen, M. G., & Hu, Z. B_3          | 2008             | Performance | Task_strategies          | Integrated | Senior            | 0.08        | 270         | 51.48                |
| Chen, M. G., & Hu, Z. B_4          | 2008             | Forethought | Goal_orientation         | Integrated | Senior            | -0.09       | 270         | 51.48                |
| Chen, M. G., & Hu, Z. B_5          | 2008             | Forethought | Goal_orientation         | Integrated | Senior            | -0.04       | 270         | 51.48                |
| Chen, M. G., & Hu, Z. B_6          | 2008             | Forethought | Goal_orientation         | Integrated | Senior            | 0.09        | 270         | 51.48                |
| Chi, Y. K., & Zhou, G. T_1         | 2003             | Forethought | Self-efficacy            | Integrated | Junior            | 0.49        | 227         | 50.66                |
| Chi, Y. K., & Zhou, G. T_2         | 2003             | Performance | Task_strategies          | Integrated | Junior            | 0.22        | 227         | 50.66                |
| Chi, Y. K., & Zhou, G. T_3         | 2003             | Performance | Task_strategies          | Integrated | Junior            | 0.22        | 227         | 51                   |
| Cui, N., Liu, Y. Y., & Gao, B. Y_1 | 2008             | Forethought | Goal_orientation         | Language   | Senior            | 0.076       | 329         | 39.81                |
| Cui, N., Liu, Y. Y., & Gao, B. Y_2 | 2008             | Forethought | Goal_orientation         | Language   | Senior            | -0.079      | 329         | 39.81                |
| Cui, N., Liu, Y. Y., & Gao, B. Y_3 | 2008             | Forethought | Goal_orientation         | Language   | Senior            | -0.001      | 329         | 39.81                |
| Cui, N., Liu, Y. Y., & Gao, B. Y_4 | 2008             | Forethought | Goal_orientation         | Science    | Senior            | 0.126       | 329         | 39.81                |
| Cui, N., Liu, Y. Y., & Gao, B. Y_5 | 2008             | Forethought | Goal_orientation         | Science    | Senior            | -0.175      | 329         | 39.81                |
| Cui, N., Liu, Y. Y., & Gao, B. Y_6 | 2008             | Forethought | Goal_orientation         | Science    | Senior            | -0.003      | 329         | 39.81                |

| Independent sample ID               | Publication year | SRL Phases  | SRL strategies   | Discipline | Educational stage | Correlation | Sample size | Percentage of female |
|-------------------------------------|------------------|-------------|------------------|------------|-------------------|-------------|-------------|----------------------|
| Cui, N., Liu, Y. Y., & Gao, B. Y_7  | 2008             | Forethought | Goal_orientation | Language   | Senior            | 0.075       | 329         | 39.81                |
| Cui, N., Liu, Y. Y., & Gao, B. Y_8  | 2008             | Forethought | Goal_orientation | Language   | Senior            | -0.008      | 329         | 39.81                |
| Cui, N., Liu, Y. Y., & Gao, B. Y_8  | 2008             | Forethought | Goal_orientation | Integrated | Senior            | 0.123       | 329         | 39.81                |
| Cui, N., Liu, Y. Y., & Gao, B. Y_9  | 2008             | Forethought | Goal_orientation | Integrated | Senior            | -0.117      | 329         | 39.81                |
| Cui, N., Liu, Y. Y., & Gao, B. Y_10 | 2008             | Forethought | Goal_orientation | Integrated | Senior            | 0.037       | 329         | 39.81                |
| Cui, N., Liu, Y. Y., & Gao, B. Y_11 | 2008             | Forethought | Goal_orientation | Language   | Senior            | 0.097       | 329         | 39.81                |
| Ge, M, G., & Jin, Y_1               | 2005             | Performance | Task_strategies  | Language   | Senior            | 0.2         | 239         | 44.77                |
| Ge, M, G., & Jin, Y_2               | 2005             | Performance | Task_strategies  | Language   | Senior            | 0.01        | 239         | 44.77                |
| Ge, M, G., & Jin, Y_3               | 2005             | Performance | Task_strategies  | Language   | Senior            | 0.12        | 239         | 44.77                |
| Ge, M, G., & Jin, Y_4               | 2005             | Performance | Task_strategies  | Language   | Senior            | 0.16        | 239         | 44.77                |
| Ge, M, G., & Jin, Y_5               | 2005             | Performance | Task_strategies  | Language   | Senior            | 0.23        | 239         | 44.77                |
| Gu, S. H., Xin, T., & Li, H_1       | 1998             | Performance | Task_strategies  | Science    | Junior            | 0.476       | 109         | 44.95                |
| Gu, S. H., Xin, T., & Li, H_2       | 1998             | Performance | Task_strategies  | Language   | Junior            | 0.513       | 105         | 50.48                |
| Gu, S. H., Xin, T., & Li, H_3       | 1998             | Performance | Task_strategies  | Science    | Junior            | 0.483       | 109         | 44.95                |
| Gu, S. H., Xin, T., & Li, H_4       | 1998             | Performance | Task_strategies  | Science    | Junior            | 0.511       | 109         | 44.95                |
| Gu, S. H., Xin, T., & Li, H_5       | 1998             | Performance | Task_strategies  | Science    | Junior            | 0.497       | 109         | 44.95                |
| Gu, S. H., Xin, T., & Li, H_6       | 1998             | Performance | Task_strategies  | Language   | Junior            | 0.495       | 109         | 44.95                |
| Gu, S. H., Xin, T., & Li, H_7       | 1998             | Performance | Task_strategies  | Language   | Junior            | 0.503       | 109         | 44.95                |
| Gu, S. H., Xin, T., & Li, H_8       | 1998             | Performance | Task_strategies  | Language   | Junior            | 0.528       | 109         | 44.95                |
| Gu, S. H., Xin, T., & Li, H_9       | 1998             | Performance | Task_strategies  | Science    | Junior            | 0.416       | 105         | 50.48                |
| Gu, S. H., Xin, T., & Li, H_10      | 1998             | Performance | Task_strategies  | Science    | Junior            | 0.505       | 105         | 50.48                |
| Gu, S. H., Xin, T., & Li, H_12      | 1998             | Performance | Task_strategies  | Science    | Junior            | 0.466       | 105         | 50.48                |
| Gu, S. H., Xin, T., & Li, H_13      | 1998             | Performance | Task_strategies  | Science    | Junior            | 0.457       | 105         | 50.48                |
| Gu, S. H., Xin, T., & Li, H_14      | 1998             | Performance | Task_strategies  | Language   | Junior            | 0.337       | 105         | 50.48                |
| Gu, S. H., Xin, T., & Li, H_15      | 1998             | Performance | Task_strategies  | Language   | Junior            | 0.531       | 105         | 50.48                |
| Gu, S. H., Xin, T., & Li, H_16      | 1998             | Performance | Task_strategies  | Language   | Junior            | 0.561       | 105         | 50.48                |
| Gu, S. H., Xin, T., & Li, H_17      | 1998             | Performance | Task_strategies  | Language   | Junior            | 0.48        | 109         | 44.95                |
| Guo, W_1                            | 2008             | Forethought | Self-efficacy    | Integrated | Junior_Senior     | 0.462       | 475         | 55.79                |

| Independent sample ID                   | Publication year | SRL Phases  | SRL strategies           | Discipline | Educational stage | Correlation | Sample size | Percentage of female |
|-----------------------------------------|------------------|-------------|--------------------------|------------|-------------------|-------------|-------------|----------------------|
| Guo, W_2                                | 2008             | Forethought | Self-efficacy            | Integrated | Junior_Senior     | 0.467       | 475         | 55.79                |
| Guo, W_3                                | 2008             | Performance | Self-efficacy            | Integrated | Junior_Senior     | 0.485       | 475         | 55.79                |
| Guo, W_4                                | 2008             | Performance | Metacognitive_monitoring | Integrated | Junior_Senior     | 0.422       | 475         | 55.79                |
| Guo, W_5                                | 2008             | Forethought | Task_interest/value      | Integrated | Junior_Senior     | 0.293       | 475         | 55.79                |
| Guo, W_6                                | 2008             | Performance | Attention_focusing       | Integrated | Junior_Senior     | 0.467       | 475         | 55.79                |
| Guo, W_7                                | 2008             | Performance | Attention_focusing       | Integrated | Junior_Senior     | 0.418       | 475         | 55.79                |
| Guo, W_8                                | 2008             | Performance | Attention_focusing       | Integrated | Junior_Senior     | 0.564       | 475         | 55.79                |
| Han, X. H., Zheng, L. N., & Liu, R. J_1 | 2015             | Performance | Metacognitive_monitoring | Integrated | Elementary        | -0.104      | 813         | NA                   |
| Han, X. H., Zheng, L. N., & Liu, R. J_2 | 2015             | Performance | Task_strategies          | Integrated | Elementary        | 0.092       | 813         | NA                   |
| Han, X. H., Zheng, L. N., & Liu, R. J_3 | 2015             | Forethought | Self-efficacy            | Integrated | Elementary        | 0.273       | 813         | NA                   |
| Ji, H. Y                                | 2005             | Pooled      | Integrated               | Integrated | Junior_Senior     | 0.752       | 726         | 50                   |
| Jiang, J. C., & Liu, H. S_1             | 2005             | Forethought | Goal_orientation         | Integrated | Junior_Senior     | -0.19       | 283         | 47.7                 |
| Jiang, J. C., & Liu, H. S_2             | 2005             | Forethought | Goal_orientation         | Integrated | Junior_Senior     | 0.13        | 283         | 47.7                 |
| Jiang, J. C., & Liu, H. S_3             | 2005             | Forethought | Goal_orientation         | Integrated | Junior_Senior     | 0.13        | 283         | 47.7                 |
| Jiang, M. R., Song, H. S., & Zhang, L_1 | 2014             | Reflection  | Self-evaluation          | Science    | Senior            | 0.315       | 186         | NA                   |
| Jiang, M. R., Song, H. S., & Zhang, L_2 | 2014             | Reflection  | Self-evaluation          | Science    | Senior            | 0.675       | 186         | NA                   |
| Jiang, M. R., Song, H. S., & Zhang, L_3 | 2014             | Reflection  | Self-evaluation          | Science    | Senior            | 0.712       | 186         | NA                   |
| Jiang, M. R., Song, H. S., & Zhang, L_4 | 2014             | Reflection  | Self-evaluation          | Science    | Senior            | 0.733       | 186         | NA                   |
| Jiang, Y. Z., & Zhang, H. Z             | 2012             | Forethought | Self-efficacy            | Integrated | Junior            | 0.23        | 357         | 46.78                |
| Jiao, C. Z_1                            | 2008             | Forethought | Self-efficacy            | Science    | Junior            | 0.63        | 458         | 51.97                |
| Jiao, C. Z_2                            | 2008             | Forethought | Task_interest/value      | Science    | Junior            | 0.5         | 458         | 51.97                |
| Jin, G. Y., Gao, J. J., & Chen, Y, W_1  | 2012             | Forethought | Self-efficacy            | Science    | Junior_Senior     | 0.5         | 819         | 47.13                |
| Jin, G. Y., Gao, J. J., & Chen, Y, W_2  | 2012             | Performance | Task_strategies          | Science    | Junior_Senior     | 0.37        | 819         | 47.13                |
| Jin, G. Y., Gao, J. J., & Chen, Y, W_3  | 2012             | Performance | Task_strategies          | Science    | Junior_Senior     | 0.44        | 819         | 47.13                |
| Jin, G. Y., Gao, J. J., & Chen, Y,      | 2012             | Performance | Task_strategies          | Science    | Junior_Senior     | 0.41        | 819         | 47.13                |

| Independent sample ID                      | Publication year | SRL Phases  | SRL strategies           | Discipline | Educational stage | Correlation | Sample size | Percentage of female |
|--------------------------------------------|------------------|-------------|--------------------------|------------|-------------------|-------------|-------------|----------------------|
| W_4                                        |                  |             |                          |            |                   |             |             |                      |
| Lei, L., Wang, L., & Culjak, T_1           | 2001             | Forethought | Goal_orientation         | Integrated | Elementary        | 0.105       | 279         | 45.88                |
| Lei, L., Wang, L., & Culjak, T_2           | 2001             | Forethought | Goal_orientation         | Integrated | Elementary        | 0.029       | 279         | 45.88                |
| Lei, L., Wang, L., & Culjak, T_3           | 2001             | Forethought | Goal_orientation         | Integrated | Elementary        | 0.061       | 279         | 45.88                |
| Li, B., & Yang, J. L_1                     | 2004             | Forethought | Self-efficacy            | Integrated | Junior            | 0.567       | 438         | 49.32                |
| Li, B., & Yang, J. L_2                     | 2004             | Performance | Task_strategies          | Integrated | Junior            | 0.282       | 438         | 49.32                |
| Li, B., & Yang, J. L_3                     | 2004             | Performance | Task_strategies          | Integrated | Junior            | 0.167       | 438         | 49.32                |
| Li, B., & Yang, J. L_4                     | 2004             | Performance | Task_strategies          | Integrated | Junior            | 0.188       | 438         | 49.32                |
| Li, B., & Yang, J. L_5                     | 2004             | Reflection  | Attribution              | Integrated | Junior            | 0.152       | 438         | 47                   |
| Li, H. X., Lin, X., & Si, J. W_1           | 2015             | Performance | Task_strategies          | Integrated | Elementary        | 0.07        | 492         | 47                   |
| Li, H. X., Lin, X., & Si, J. W_2           | 2015             | Performance | Task_strategies          | Integrated | Elementary        | 0.21        | 492         | 47                   |
| Li, J. D., An, M., He, T. T., & Ge, G. Y_1 | 2009             | Forethought | Self-efficacy            | Integrated | Junior_Senior     | 0.244       | 910         | NA                   |
| Li, J. D., An, M., He, T. T., & Ge, G. Y_2 | 2009             | Performance | Metacognitive_monitoring | Integrated | Junior_Senior     | 0.185       | 910         | NA                   |
| Li, J., Zhang, J., & Zhu, L. Q_1           | 2011             | Reflection  | Self-evaluation          | Language   | Junior_Senior     | 0.185       | 450         | 46                   |
| Li, J., Zhang, J., & Zhu, L. Q_2           | 2011             | Reflection  | Self-evaluation          | Science    | Junior_Senior     | 0.053       | 450         | 46                   |
| Li, J., Zhang, J., & Zhu, L. Q_3           | 2011             | Reflection  | Self-evaluation          | Language   | Junior_Senior     | 0.13        | 450         | 46                   |
| Li, S., & Yu, X. X_1                       | 2002             | Performance | Metacognitive_monitoring | Integrated | Junior            | 0.317       | 265         | 50.57                |
| Li, S., & Yu, X. X_2                       | 2002             | Performance | Metacognitive_monitoring | Integrated | Junior            | 0.23        | 265         | 50.57                |
| Li, S., & Yu, X. X_3                       | 2002             | Performance | Metacognitive_monitoring | Integrated | Junior            | 0.333       | 265         | 50.57                |
| Li, S., & Yu, X. X_4                       | 2002             | Performance | Metacognitive_monitoring | Integrated | Junior            | 0.312       | 265         | 50.57                |
| Li, S., & Yu, X. X_5                       | 2002             | Performance | Metacognitive_monitoring | Integrated | Junior            | 0.164       | 265         | 50.57                |
| Li, S., & Yu, X. X_6                       | 2002             | Performance | Metacognitive_monitoring | Integrated | Junior            | 0.322       | 265         | 50.57                |
| Li, S., & Yu, X. X_7                       | 2002             | Performance | Metacognitive_monitoring | Integrated | Junior            | 0.408       | 265         | 50.57                |
| Li, S., & Yu, X. X_8                       | 2002             | Performance | Metacognitive_monitoring | Integrated | Junior            | 0.238       | 265         | 50.57                |
| Li, S., & Yu, X. X_9                       | 2002             | Performance | Task_strategies          | Integrated | Junior            | 0.349       | 265         | 50.57                |
| Li, S., & Yu, X. X_10                      | 2002             | Performance | Task_strategies          | Integrated | Junior            | 0.245       | 265         | 50.57                |
| Li, S., & Yu, X. X_11                      | 2002             | Performance | Task_strategies          | Integrated | Junior            | 0.326       | 265         | 50.57                |
| Li, S., & Yu, X. X_12                      | 2002             | Performance | Task_strategies          | Integrated | Junior            | 0.264       | 265         | 50.57                |
| Li, S., & Yu, X. X_13                      | 2002             | Performance | Task_strategies          | Integrated | Junior            | 0.357       | 265         | 50.57                |
| Li, S., & Yu, X. X_14                      | 2002             | Performance | Metacognitive_monitoring | Integrated | Junior            | 0.052       | 265         | 50.57                |

| Independent sample ID                             | Publication year | SRL Phases  | SRL strategies      | Discipline | Educational stage | Correlation | Sample size | Percentage of female |
|---------------------------------------------------|------------------|-------------|---------------------|------------|-------------------|-------------|-------------|----------------------|
| Li, X. Y., & Li, J. W_1                           | 2004             | Pooled      | Integrated          | Science    | Junior            | 0.379       | 266         | 40                   |
| Li, X. Y., & Li, J. W_2                           | 2004             | Performance | Task_strategies     | Science    | Junior            | 0.174       | 266         | 40                   |
| Li, X. Y., & Li, J. W_3                           | 2004             | Forethought | Goal_orientation    | Science    | Junior            | 0.289       | 266         | 40                   |
| Li, X. Y., & Li, J. W_4                           | 2004             | Forethought | Self-efficacy       | Science    | Junior            | 0.547       | 266         | 40                   |
| Li, X. Y., & Li, J. W_5                           | 2004             | Reflection  | Attribution         | Science    | Junior            | 0.192       | 266         | 40                   |
| Li, Z. X., & Hu, Y. R_1                           | 2014             | Forethought | Self-efficacy       | Integrated | Junior            | 0.459       | 222         | 54.95                |
| Li, Z. X., & Hu, Y. R_2                           | 2014             | Forethought | Goal_orientation    | Integrated | Junior            | 0.309       | 222         | 54.95                |
| Li, Z. X., & Hu, Y. R_3                           | 2014             | Forethought | Goal_orientation    | Integrated | Junior            | -0.088      | 222         | 54.95                |
| Li, Z. X., & Hu, Y. R_4                           | 2014             | Forethought | Goal_orientation    | Integrated | Junior            | 0.343       | 222         | 54.95                |
| Li, Z. X., & Hu, Y. R_5                           | 2014             | Forethought | Goal_orientation    | Integrated | Junior            | 0.393       | 222         | 54.95                |
| Liu, J. L., & Liu, S. X_1                         | 2016             | Forethought | Task_interest/value | Integrated | Junior            | 0.577       | 305         | 53.29                |
| Liu, J. L., & Liu, S. X_2                         | 2016             | Forethought | Self-efficacy       | Integrated | Junior            | 0.619       | 304         | 53.29                |
| Liu, J. X., Xin, T., Huang, G. Q., & Shen, J. L_1 | 2000             | Performance | Task_strategies     | Integrated | Junior_Senior     | 0.364       | 398         | 51.01                |
| Liu, J. X., Xin, T., Huang, G. Q., & Shen, J. L_2 | 2000             | Performance | Task_strategies     | Integrated | Junior_Senior     | 0.459       | 398         | 51.01                |
| Liu, J. X., Xin, T., Huang, G. Q., & Shen, J. L_3 | 2000             | Performance | Task_strategies     | Integrated | Junior_Senior     | 0.403       | 398         | 51.01                |
| Liu, J. X., Xin, T., Huang, G. Q., & Shen, J. L_4 | 2000             | Performance | Task_strategies     | Integrated | Junior_Senior     | 0.4         | 398         | 51.01                |
| Liu, J. X., Xin, T., Huang, G. Q., & Shen, J. L_5 | 2000             | Performance | Task_strategies     | Integrated | Junior_Senior     | 0.455       | 398         | 51.01                |
| Liu, T                                            | 2015             | Forethought | Self-efficacy       | Integrated | Junior            | 0.27        | 302         | 51                   |
| Ran, R., Huang, Y. Q., & Yu, J_1                  | 2012             | Forethought | Self-efficacy       | Integrated | Junior            | 0.268       | 262         | 61.83                |
| Ran, R., Huang, Y. Q., & Yu, J_2                  | 2012             | Forethought | Self-efficacy       | Integrated | Junior            | 0.24        | 262         | 61.83                |
| Ran, R., Huang, Y. Q., & Yu, J_3                  | 2012             | Forethought | Self-efficacy       | Integrated | Junior            | 0.022       | 262         | 61.83                |
| Wang, J. X., & Zhang, K                           | 2008             | Reflection  | Attribution         | Integrated | Junior            | 0.424       | 134         | 57.46                |
| Wang, L. J_1                                      | 2013             | Forethought | Goal_orientation    | Integrated | Junior_Senior     | -0.025      | 986         | 53.04                |
| Wang, L. J_2                                      | 2013             | Forethought | Goal_orientation    | Integrated | Junior_Senior     | 0.108       | 986         | 53.04                |
| Wang, L. J_3                                      | 2013             | Forethought | Goal_orientation    | Integrated | Junior_Senior     | 0.075       | 986         | 53.04                |
| Wang, L. J_4                                      | 2013             | Forethought | Goal_orientation    | Integrated | Junior_Senior     | 0.104       | 986         | 53.04                |
| Wang, L. J_5                                      | 2013             | Forethought | Goal_orientation    | Integrated | Junior_Senior     | 0.105       | 986         | 53.04                |
| Wang, Y. X., Cao, Y. T., & Tang, X. L_1           | 2013             | Forethought | Self-efficacy       | Integrated | Senior            | 0.305       | 794         | 56.05                |

| Independent sample ID                   | Publication year | SRL Phases  | SRL strategies           | Discipline | Educational stage | Correlation | Sample size | Percentage of female |
|-----------------------------------------|------------------|-------------|--------------------------|------------|-------------------|-------------|-------------|----------------------|
| Wang, Y. X., Cao, Y. T., & Tang, X. L_2 | 2013             | Forethought | Self-efficacy            | Language   | Senior            | 0.269       | 794         | 56.05                |
| Wang, Y. X., Cao, Y. T., & Tang, X. L_3 | 2013             | Forethought | Self-efficacy            | Science    | Senior            | 0.232       | 794         | 56.05                |
| Wang, Y. X., Cao, Y. T., & Tang, X. L_4 | 2013             | Forethought | Self-efficacy            | Language   | Senior            | 0.224       | 794         | 56.05                |
| Wang, Y. Z., Wang, S. Z., & Ou, Y. L_1  | 2005             | Forethought | Self-efficacy            | Language   | Junior            | 0.319       | 263         | 42.59                |
| Wang, Y. Z., Wang, S. Z., & Ou, Y. L_2  | 2005             | Forethought | Self-efficacy            | Science    | Junior            | 0.369       | 263         | 42.59                |
| Wang, Y. Z., Wang, S. Z., & Ou, Y. L_3  | 2005             | Forethought | Self-efficacy            | Language   | Junior            | 0.263       | 263         | 42.59                |
| Wang, Y. Z., Wang, S. Z., & Ou, Y. L_4  | 2005             | Forethought | Self-efficacy            | Integrated | Junior            | 0.387       | 263         | 42.59                |
| Wei, X. C., & Zhang, Y. F_1             | 2014             | Forethought | Self-efficacy            | Language   | Senior            | 0.18        | 296         | 63.18                |
| Wei, X. C., & Zhang, Y. F_2             | 2014             | Reflection  | Attribution              | Language   | Senior            | 0.088       | 296         | 63.18                |
| Wu, J. Y, Hu, X. L., & Peng, J. S_1     | 2011             | Forethought | Self-efficacy            | Science    | Senior            | 0.026       | 141         | 46.1                 |
| Wu, J. Y, Hu, X. L., & Peng, J. S_2     | 2011             | Forethought | Self-efficacy            | Science    | Senior            | 0.459       | 141         | 46.1                 |
| Xu, L. L. & Guo, W_1                    | 2007             | Forethought | Goal_orientation         | Language   | Senior            | -0.123      | 259         | 44.01                |
| Xu, L. L. & Guo, W_2                    | 2007             | Forethought | Goal_orientation         | Language   | Senior            | 0.113       | 259         | 44.01                |
| Xu, L. L. & Guo, W_3                    | 2007             | Forethought | Goal_orientation         | Language   | Senior            | 0.233       | 259         | 44.01                |
| Yao, C. L                               | 2013             | Performance | Task_strategies          | Language   | Senior            | 0.262       | 611         | 63.99                |
| Yao, D. W. Yan, L. F. Musa, A. & Liu, G | 2011             | Performance | Task_strategies          | Integrated | Junior            | 0.219       | 416         | 57.7                 |
| Yuan, L. X_1                            | 2005             | Performance | Task_strategies          | Integrated | Junior_Senior     | 0.253       | 545         | 55.96                |
| Yuan, L. X_2                            | 2005             | Forethought | Self-efficacy            | Integrated | Junior_Senior     | 0.209       | 545         | 55.96                |
| Yuan, L. X_3                            | 2005             | Forethought | Goal_orientation         | Integrated | Junior_Senior     | -0.093      | 545         | 55.96                |
| Yuan, L. X_4                            | 2005             | Forethought | Goal_orientation         | Integrated | Junior_Senior     | 0.079       | 545         | 55.96                |
| Yuan, L. X_5                            | 2005             | Forethought | Goal_orientation         | Integrated | Junior_Senior     | 0.194       | 545         | 55.96                |
| Zhang, F & Liu, C_1                     | 2012             | Performance | Metacognitive_monitoring | Integrated | Junior_Senior     | 0.22        | 308         | 57.47                |
| Zhang, F & Liu, C_2                     | 2012             | Performance | Metacognitive_monitoring | Language   | Junior_Senior     | 0.19        | 308         | 57.47                |
| Zhang, F & Liu, C_3                     | 2012             | Performance | Metacognitive_monitoring | Science    | Junior_Senior     | 0.23        | 308         | 57.47                |
| Zhang, F & Liu, C_4                     | 2012             | Performance | Metacognitive_monitoring | Language   | Junior_Senior     | 0.06        | 308         | 57.47                |

| Independent sample ID             | Publication year | SRL Phases  | SRL strategies           | Discipline | Educational stage | Correlation | Sample size | Percentage of female |
|-----------------------------------|------------------|-------------|--------------------------|------------|-------------------|-------------|-------------|----------------------|
| Zhang, F & Liu, C_5               | 2012             | Performance | Metacognitive_monitoring | Integrated | Junior_Senior     | 0.22        | 308         | 57.47                |
| Zhang, F & Liu, C_6               | 2012             | Reflection  | Self-evaluation          | Language   | Junior_Senior     | 0.13        | 308         | 57.47                |
| Zhang, F & Liu, C_7               | 2012             | Reflection  | Self-evaluation          | Science    | Junior_Senior     | 0.14        | 308         | 57.47                |
| Zhang, F & Liu, C_8               | 2012             | Reflection  | Self-evaluation          | Language   | Junior_Senior     | 0.01        | 308         | 57.47                |
| Zhang, F & Liu, C_9               | 2012             | Reflection  | Self-evaluation          | Integrated | Junior_Senior     | 0.13        | 308         | 57.47                |
| Zhang, F & Liu, C_10              | 2012             | Reflection  | Attention_focusing       | Language   | Junior_Senior     | 0.13        | 308         | 57.47                |
| Zhang, F & Liu, C_11              | 2012             | Performance | Metacognitive_monitoring | Language   | Junior_Senior     | 0.2         | 308         | 57.47                |
| Zhang, F & Liu, C_12              | 2012             | Performance | Attention_focusing       | Science    | Junior_Senior     | 0.11        | 308         | 57.47                |
| Zhang, F & Liu, C_13              | 2012             | Performance | Attention_focusing       | Language   | Junior_Senior     | 0.01        | 308         | 57.47                |
| Zhang, F & Liu, C_14              | 2012             | Performance | Attention_focusing       | Integrated | Junior_Senior     | 0.12        | 308         | 57.47                |
| Zhang, F & Liu, C_15              | 2012             | Performance | Task_strategies          | Language   | Junior_Senior     | 0.13        | 308         | 57.47                |
| Zhang, F & Liu, C_16              | 2012             | Performance | Task_strategies          | Science    | Junior_Senior     | 0.12        | 308         | 57.47                |
| Zhang, F & Liu, C_17              | 2012             | Performance | Task_strategies          | Language   | Junior_Senior     | -0.02       | 308         | 57.47                |
| Zhang, F & Liu, C_18              | 2012             | Performance | Metacognitive_monitoring | Science    | Junior_Senior     | 0.23        | 308         | 57.47                |
| Zhang, F & Liu, C_19              | 2012             | Performance | Task_strategies          | Integrated | Junior_Senior     | 0.12        | 308         | 57.47                |
| Zhang, F & Liu, C_20              | 2012             | Forethought | Goal_setting             | Language   | Junior_Senior     | 0.17        | 308         | 57.47                |
| Zhang, F & Liu, C_21              | 2012             | Forethought | Goal_setting             | Science    | Junior_Senior     | 0.31        | 308         | 57.47                |
| Zhang, F & Liu, C_22              | 2012             | Forethought | Goal_setting             | Language   | Junior_Senior     | 0.16        | 308         | 57.47                |
| Zhang, F & Liu, C_23              | 2012             | Forethought | Goal_setting             | Integrated | Junior_Senior     | 0.28        | 308         | 57.47                |
| Zhang, F & Liu, C_24              | 2012             | Performance | Metacognitive_monitoring | Language   | Junior_Senior     | 0.06        | 308         | 57.47                |
| Zhang, F & Liu, C_25              | 2012             | Performance | Metacognitive_monitoring | Language   | Junior_Senior     | 0.19        | 308         | 57.47                |
| Zhang, F & Liu, C_26              | 2012             | Performance | Metacognitive_monitoring | Science    | Junior_Senior     | 0.23        | 308         | 57.47                |
| Zhang, F & Liu, C_27              | 2012             | Performance | Metacognitive_monitoring | Language   | Junior_Senior     | 0.07        | 308         | 57.47                |
| Zhang, F & Liu, C_28              | 2012             | Performance | Metacognitive_monitoring | Integrated | Junior_Senior     | 0.23        | 308         | 57.47                |
| Zhang, J. Liu, J. W. & Wu, Q. L_1 | 2012             | Performance | Metacognitive_monitoring | Integrated | Junior            | 0.07        | 600         | 51.67                |
| Zhang, J. Liu, J. W. & Wu, Q. L_2 | 2012             | Forethought | Self-efficacy            | Integrated | Junior            | 0.13        | 600         | 51.67                |
| Zhang, J. Liu, J. W. & Wu, Q. L_3 | 2012             | Forethought | Goal_orientation         | Integrated | Junior            | -0.08       | 600         | 51.67                |
| Zhang, J. Liu, J. W. & Wu, Q. L_4 | 2012             | Forethought | Goal_orientation         | Integrated | Junior            | -0.03       | 600         | 51.67                |
| Zhang, J. Liu, J. W. & Wu, Q.     | 2012             | Forethought | Goal_orientation         | Integrated | Junior            | -0.01       | 600         | 51.67                |



| Independent sample ID                | Publication year | SRL Phases  | SRL strategies           | Discipline | Educational stage | Correlation | Sample size | Percentage of female |
|--------------------------------------|------------------|-------------|--------------------------|------------|-------------------|-------------|-------------|----------------------|
| L_5                                  |                  |             |                          |            |                   |             |             |                      |
| Zhang, J. Liu, J. W. & Wu, Q.        | 2012             | Forethought | Goal_orientation         | Integrated | Junior            | 0.14        | 600         | 51.67                |
| L_6                                  |                  |             |                          |            |                   |             |             |                      |
| Zhang, J. X & Zhang, C_1             | 2008             | Performance | Metacognitive_monitoring | Integrated | Elementary_Junior | 0.125       | 674         | NA                   |
| Zhang, J. X & Zhang, C_2             | 2008             | Performance | Metacognitive_monitoring | Integrated | Elementary_Junior | 0.147       | 674         | NA                   |
| Zhang, J. X & Zhang, C_3             | 2008             | Performance | Metacognitive_monitoring | Language   | Elementary_Junior | 0.074       | 674         | NA                   |
| Zhang, J_1                           | 2011             | Forethought | Self-efficacy            | Language   | Senior            | 0.148       | 523         | 52.58                |
| Zhang, J_2                           | 2011             | Forethought | Self-efficacy            | Language   | Senior            | 0.228       | 523         | 52.58                |
| Zhang, J_3                           | 2011             | Performance | Task_strategies          | Language   | Senior            | 0.076       | 523         | 52.58                |
| Zhang, J_4                           | 2011             | Performance | Task_strategies          | Language   | Senior            | 0.079       | 523         | 52.58                |
| Zhang, J_5                           | 2011             | Performance | Task_strategies          | Language   | Senior            | 0.163       | 523         | 52.58                |
| Zhang, J_6                           | 2011             | Performance | Task_strategies          | Language   | Senior            | 0.197       | 523         | 52.58                |
| Zhang, J_7                           | 2011             | Performance | Task_strategies          | Language   | Senior            | 0.179       | 523         | 52.58                |
| Zhang, J_8                           | 2011             | Performance | Task_strategies          | Language   | Senior            | 0.2         | 523         | 52.58                |
| Zhang, L & You, Z. Q                 | 2014             | Performance | Task_strategies          | Integrated | Junior            | 0.45        | 448         | 47.1                 |
| Zhang, L. H, Sun, X. J, & Feng, J. Y | 2011             | Performance | Metacognitive_monitoring | Language   | Elementary        | 0.596       | 60          | 55                   |
| Zhang, W                             | 2013             | Forethought | Self-efficacy            | Science    | Junior            | 0.4         | 84          | 40.48                |
| Zhang, W, H & Shen, J. L_1           | 2006             | Forethought | Goal_orientation         | Language   | Elementary        | -0.03       | 686         | 49.85                |
| Zhang, W, H & Shen, J. L_2           | 2006             | Forethought | Goal_orientation         | Language   | Elementary        | 0.11        | 686         | 49.85                |
| Zhang, W, H & Shen, J. L_3           | 2006             | Forethought | Goal_orientation         | Science    | Elementary        | -0.09       | 686         | 49.85                |
| Zhang, W, H & Shen, J. L_4           | 2006             | Forethought | Goal_orientation         | Science    | Elementary        | 0.1         | 686         | 49.85                |
| Zhang, W, H & Shen, J. L_5           | 2006             | Forethought | Goal_orientation         | Language   | Elementary        | -0.1        | 686         | 49.85                |
| Zhang, W, H & Shen, J. L_6           | 2006             | Forethought | Goal_orientation         | Language   | Elementary        | 0.15        | 686         | 49.85                |
| Zhang, W, H & Shen, J. L_7           | 2006             | Forethought | Goal_orientation         | Integrated | Elementary        | -0.09       | 686         | 49.85                |
| Zhang, W, H & Shen, J. L_8           | 2006             | Forethought | Goal_orientation         | Integrated | Elementary        | 0.15        | 686         | 49.85                |
| Zhang, X. H & Gao, C. Y_1            | 2010             | Performance | Task_strategies          | Language   | Senior            | 0.194       | 200         | 34.5                 |
| Zhang, X. H & Gao, C. Y_2            | 2010             | Performance | Metacognitive_monitoring | Language   | Senior            | 0.081       | 200         | 34.5                 |
| Zhang, X. H & Gao, C. Y_3            | 2010             | Performance | Metacognitive_monitoring | Language   | Senior            | 0.231       | 200         | 34.5                 |
| Zhang, X. H & Gao, C. Y_4            | 2010             | Performance | Metacognitive_monitoring | Language   | Senior            | 0.155       | 200         | 34.5                 |
| Zhang, X. H & Gao, C. Y_5            | 2010             | Performance | Metacognitive_monitoring | Language   | Senior            | 0.083       | 200         | 34.5                 |
| Zhang, X. X & Yang, Y. X_1           | 2012             | Forethought | Goal_orientation         | Language   | Junior            | -0.103      | 72          | 61.11                |

| Independent sample ID                              | Publication year | SRL Phases  | SRL strategies           | Discipline | Educational stage | Correlation | Sample size | Percentage of female |
|----------------------------------------------------|------------------|-------------|--------------------------|------------|-------------------|-------------|-------------|----------------------|
| Zhang, X. X & Yang, Y. X_2                         | 2012             | Forethought | Goal_orientation         | Language   | Junior            | -0.012      | 72          | 61.11                |
| Zhang, X. X & Yang, Y. X_3                         | 2012             | Forethought | Goal_orientation         | Language   | Junior            | -0.516      | 72          | 61.11                |
| Zhang, X. X & Yang, Y. X_4                         | 2012             | Forethought | Goal_orientation         | Language   | Junior            | 0.046       | 72          | 61.11                |
| Zhang, Y & Li, Q. W_1                              | 2010             | Forethought | Goal_orientation         | Integrated | Junior            | 0.162       | 1140        | NA                   |
| Zhang, Y & Li, Q. W_2                              | 2010             | Forethought | Goal_orientation         | Integrated | Junior            | 0.251       | 1140        | NA                   |
| Zhang, Y & Li, Q. W_3                              | 2010             | Reflection  | Attribution              | Integrated | Junior            | -0.158      | 1140        | NA                   |
| Zhang, Y.F, Wei, X.C, & He, H_1                    | 2014             | Reflection  | Attribution              | Language   | Senior            | 0.041       | 296         | 63.18                |
| Zhang, Y.F, Wei, X.C, & He, H_2                    | 2014             | Reflection  | Attribution              | Science    | Senior            | 0.081       | 296         | 63.18                |
| Zhou, L.H & Liu, Y_1                               | 2012             | Performance | Attention_focusing       | Science    | Senior            | 0.098       | 305         | 39.67                |
| Zhou, L.H & Liu, Y_2                               | 2012             | Reflection  | Self-satisfaction/affect | Science    | Senior            | 0.082       | 305         | 39.67                |
| Zhou, L.H & Liu, Y_3                               | 2012             | Reflection  | Self-evaluation          | Science    | Senior            | 0.348       | 305         | 39.67                |
| Zhou, L.H & Liu, Y_4                               | 2012             | Forethought | Task_interest/value      | Science    | Senior            | 0.137       | 305         | 39.67                |
| Zhou, L.H & Liu, Y_5                               | 2012             | Forethought | Task_interest/value      | Science    | Senior            | 0.219       | 305         | 39.67                |
| Zhou, L.H & Liu, Y_6                               | 2012             | Reflection  | Self-evaluation          | Science    | Senior            | 0.348       | 305         | 39                   |
| Intervention Studies                               |                  |             |                          |            |                   |             |             |                      |
| Chen, X. Q., Zhang, Y. X., Jiang, Q., & Meng, X. Q | 2014             | Performance | Task_strategies          | Language   | Senior            | NA          | 111         | NA                   |
| Gao, R. C., Liu, R. D                              | 2011             | Pooled      | Integrated               | Integrated | Junior            | NA          | 184         | 44                   |
| Jiang, B., & Tan, D. L_1                           | 2007             | Performance | Task_strategies          | Language   | Elementary        | NA          | 47          | NA                   |
| Jiang, B., & Tan, D. L_2                           | 2007             | Performance | Task_strategies          | Science    | Elementary        | NA          | 47          | NA                   |
| Xu, J. B                                           | 2012             | Pooled      | Integrated               | Language   | Junior            | NA          | 98          | NA                   |

*Note.* This table provides the details for each independent sample of the studies included in the meta-analysis. *Independent sample ID* identifies the independent samples from each study. *Publication year* lists the year of publication. *SRL phases* classifies the strategies studied in each sample into “forethought”, “performance”, or “self-reflection” phases according to Zimmerman’s (2008) cyclical model of SRL; “pooled” indicates the case that two or more phases were involved. *SRL strategies* indicates the major self-regulated learning strategies studies in each sample; “integrated” indicates the case that two or more strategies were studied. *Discipline* refers to the category of academic disciplines, including language (Chinese and English), science performance (mathematics and physics), and integrated (i.e., when the study did not specify disciplines but use integrated interim or final grades). *Educational stage* refers to the level of students in the sample, including elementary, junior high, and senior high schools. *Correlation* records the correlation coefficient between SRL strategies and academic performances in the sample. *Sample size* records the number of participants in the sample. *Percentage of female* records the proportion of female students in the sample.

Table A.2 Treatment fidelity information of four intervention studies.

| Independent sample ID   | Chen et al. | Gao & Liu  | Jiang & Tan_1 | Jiang & Tan_2 | Xu       |
|-------------------------|-------------|------------|---------------|---------------|----------|
| Publication year        | 2014        | 2011       | 2007          | 2007          | 2012     |
| SRL Phases              | Performance | Pooled     | Performance   | Performance   | Pooled   |
| Educational stage       | Senior      | Junior     | Elementary    | Elementary    | Junior   |
| Discipline              | Language    | Integrated | Language      | Science       | Language |
| Sample size             | 111         | 184        | 47            | 47            | 98       |
| Treated Mean            | 88.732      | 2.24       | 92.35         | 88.23         | 78.925   |
| Treated SD              | 4.731       | 0.61       | 3.71          | 6.46          | 13.75    |
| Treated sample size     | 56          | 49         | 26            | 26            | 49       |
| Control Mean            | 87.759      | 1.62       | 92.24         | 84.05         | 73.836   |
| Control SD              | 8.321       | 0.61       | 2.76          | 5.44          | 12.912   |
| Control sample size     | 55          | 135        | 21            | 21            | 49       |
| Training of instructors | No          | No         | Yes           | Yes           | No       |
| Protocol                | No          | Yes        | Yes           | Yes           | Yes      |
| Pre-post measures       | Yes         | No         | Yes           | Yes           | Yes      |
| Number of groups        | 2           | 2          | 2             | 2             | 2        |
| Recording of sessions   | Yes         | Yes        | Yes           | Yes           | Yes      |
| Number of sessions      | 10          | 5          | 12            | 12            | 20       |
| Interview check         | Yes         | No         | No            | No            | No       |

*Note.* This table provides the designs for each independent sample from the intervention studies included in the meta-analysis. *Publication year* lists the year of publication. *SRL phases* classifies the strategies studied in each sample into “forethought”, “performance”, or “self-reflection” phases according to Zimmerman’s (2008) cyclical model of SRL; “pooled” indicates the case that two or more phases were involved. *Discipline* refers to the category of academic disciplines, including language (Chinese and English), science performance (mathematics and physics), and integrated (i.e., when the study did not specify disciplines but use integrated interim or final grades). *Educational stage* refers to the level of students in the sample, including elementary, junior high, and senior high schools. *Treated mean* through *control sample size* respectively records the mean, standard deviation (SD), and sample size in the treatment group and control group. *Training of instructors* through *interview check* indicates the fidelity information in the sample. *Training of instructors* refers to whether or not the researcher trained the instructors before the intervention. *Protocol* refers to whether or not the written protocol for intervention is available to the instructors. *Pre-post measures* indicates whether or not the academic performance was measured before and after the intervention. *Number of groups* records the number of student groups in the intervention. *Recording of sessions* refers to whether or not the intervention was recorded. *Number of sessions* records the number of intervention sessions during the study. *Interview check* refers to whether or not the researchers interviewed the students after the intervention to ensure the effectiveness of the intervention.

## References included in the meta-analysis

- An, M., & Yu, J.Y. (2009). The relationship between metacognitive monitoring and academic performance of secondary school students. *Inner Mongolia Education*, 2009(24), 11-13. Retrieved from <http://kns.cnki.net/KCMS/detail/detail.aspx?dbcode=CFJD&dbname=CJFDN0911&filename=LMJY200924005&v=MTU4NzkxRnJDVVJMS2VaK1pzRnkzbVY3M0FLU0RCZDdHNEh0ak9xNDlGWVISOGVYM Ux1eFITN0RoMVQzcVRyV00=>
- Cao, L. R., & Cao, X. H. (2004). The influence of time management disposition, cognitive style, and meta-worry on the high school students' achievement. *Chinese Journal of Ergonomics*, 10(3), 13-15. doi: 10.13837/j.issn.1006-8309.2004.03.005
- Chang, H. Q., & Pan, Y. (2013). A correlational study of time management and academic performance in secondary vocational school students. *Academy*, 2013(22), 175-176. Retrieved from <http://kns.cnki.net/KCMS/detail/detail.aspx?dbcode=CFJD&dbname=CJFDN1214&filename=XYJK201322133&v=MjMxMjFYMUx1eFITN0RoMVQzcVRyV00xRnJDVVJMS2VaK1pzRnkzbVVM05QVFRCW mJHNEg5TE9yWTVHWjRSOGU=>
- Chen, C., Gong, S. Y., & Chai, X. Y. (2013). Parent goals, classroom goal structures, personal achievement goal orientations and academic performance for middle school students. *Psychological Research*, 6(2), 78-84. Retrieved from <http://kns.cnki.net/KCMS/detail/detail.aspx?dbcode=CJFQ&dbname=CJFD2013&filename=OXLY201302015&v=MTU3Mjk5TE1yWTIFWVISOGVYMUx1eFITN0RoMVQzcVRyV00xRnJDVVJMS2VaK1pzRnkz bVU3L1BLalhIZDdHNEg=>
- Chen, J. (2009). The relationship between goal orientation, seeking help and academic performance of high school students. *Shanghai Youth*, 2009(1), 21-23. Retrieved from <http://kns.cnki.net/KCMS/detail/detail.aspx?dbcode=CJFQ&dbname=CJFD2009&filename=QNGl200901013&v=MDE0MzlpTknQTVlyRzRlIdGpNcm85RVo0UjhlWDFMdxhZUzdEaDFUM3FUcldNMUZyQ1V STEtIWitac0Z5M2xXN3o=>
- Chen, J. J., & Li, S. F. (2012). The paths of junior school students' achievement attribution and academic emotions forecasting their academic achievement. *Chinese Journal of Clinical Psychology*, 20(3), 392-394. doi: 10.16128/j.cnki.1005-3611.2012.03.004
- Chen, L. J. (2011). Relationship among achievement goal orientation, self-efficacy and academic performance of high school students. *China Journal of Health Psychology*, 19(6), 718-719. Retrieved from <http://kns.cnki.net/KCMS/detail/detail.aspx?dbcode=CJFQ&dbname=CJFD2011&filename=JKXL201106039&v=MTU0MjhIOURNcVksR2JZUjhlWDFMdxhZUzdEaDFUM3FUcldNMUZyQ1VSTEtIWitac0Z5M 2xVTDNBTHliVFlyRzQ=>
- Chen, M. G., & Hu, Z. B. (2008). Research on the relationships among goal orientation, learning strategy, attribution and academic performance in high school students. *Psychological Exploration*, 28(3), 58-62. Retrieved from <http://kns.cnki.net/KCMS/detail/detail.aspx?dbcode=CJFQ&dbname=CJFD2008&filename=XLXT200803014&v=Mjk1MzhSOGVYMUx1eFITN0RoMVQzcVRyV00xRnJDVVJMS2VaK1pzRnkzbFZMM0JQU0hU ZXJHNEh0bk1ySTIFWUk=>

- Chen, X. Q., Zhang, Y. X., Jiang, Q., & Meng, X. Q. (2014). The effects of metacognitive strategy training on English learning in high school students. *Middle school students*, 2014(11), 109-110. Retrieved from <http://kns.cnki.net/KCMS/detail/detail.aspx?dbcode=CFJD&dbname=CJFDLASN2014&filename=YGZB201431089&v=MDA4ODNVUkxLZVorWnNGeTNsVXJyUFBDclJiTEc0SDIYUHJvOU5iWVI4ZVgxTHV4WVM3RGgxVDNxVHJXTTFGckM=>
- Chi, Y. K., & Zhou, G. T. (2003). The effects of perceived pedagogical caring and self-regulate learning on academic achievement. *Journal of Guangdong Education Institute*, 23(4), 47-51. Retrieved from <http://kns.cnki.net/KCMS/detail/detail.aspx?dbcode=CJFQ&dbname=CJFD2003&filename=GJXY200304010&v=MTY1NjJmVGQ3RzRlIdExNcTQ5RVpJUjhlWDFMdXhZUZdEaDFUM3FUcldNMUZyQ1VSTEtIWitac0Z5M2tWYnpQSWk=>
- Cui, N., Liu, Y. Y., & Gao, B. Y. (2008). The relationship between achievement goal, examining anxiety and performance in senior students. *China of Journal of Health Psychology*, 16(4), 436-438. Retrieved from <http://kns.cnki.net/KCMS/detail/detail.aspx?dbcode=CJFQ&dbname=CJFD2008&filename=JKXL200804036&v=MTY0NzZkxRnJVVJMS2VaK1pzRnkza1ZMe1BMeWJUWXJHNEh0bk1xNDIHW9SOGVYMUx1eFITN0RoMVQzcVRyV00=>
- Gao, R. C., Liu, R. D., Wang, D., He, M. J., & Yuan, Z. (2011). Types of self-regulated learning of junior middle school students and their influence on learning. *Psychological Development and Education*, 2011(1), 76-82. Retrieved from <http://kns.cnki.net/KCMS/detail/detail.aspx?dbcode=CJFQ&dbname=CJFD2011&filename=XLfZ201101011&v=MTgxOTBETXJvOUVaWVI4ZVgxTHV4WVM3RGgxVDNxVHJXTTFGckNVUkxLZVorWnNGeTNrVnJ6UFBTSE5kTEc0SDk=>
- Ge, M. G., & Jin, Y. (2005). A study on the relationships between English learning strategies and academic achievement of middle school students. *Psychological Science*, 28(2), 451-453. Retrieved from <http://kns.cnki.net/KCMS/detail/detail.aspx?dbcode=CJFQ&dbname=CJFD2005&filename=XLKX200502049&v=MzI2MTVUcldNMUZyQ1VSTEtIWitac0Z5cmhWNzNCUFNIQWRyRzRlIdFRNc1k5QmJZUjhlWDFMdXhZUZdEaDFUM3E=>
- Gu, S. H., Xin, T., & Li, H. (1998). A correlational study of attribution, learning strategy, and academic achievement in junior high school students. *Psychological Development and Education*, 1998(2), 21-25. Retrieved from <http://kns.cnki.net/KCMS/detail/detail.aspx?dbcode=CJFQ&dbname=CJFD9899&filename=XLfZ802.004&v=MDYxMjFTSE5kTHU0SE0vTXI0c3FGNTRPZmdnNXpoQVU0amg0T1g2VHJIMDNiYk9jUkxxZlpPZHNFETnrVUE9PVA=>
- Guo, W. (2008). A study on the relationship between the factors of personality and academic results of middle school students. *Journal of Fu Qing Branch of Fujian Normal University*, 2008(11), 46-50. Retrieved from <http://kns.cnki.net/KCMS/detail/detail.aspx?dbcode=CJFQ&dbname=CJFD2008&filename=FJFQ200806015&v=MjAzMjFyQ1VSTEtIWitac0Z5cmdWN3pCSXlmTmY3RzRlIdG5NcVk5RVlZUjhlWDFMdXhZUZdEaDFUM3FUcldNMUY=>
- Han, X. H., Zheng, L. N., & Liu, R. J. (2015). The mediation effect of self-regulated learning in parent involvement and academic achievement in higher elementary school students. *Journal of Liaocheng University*, 28(1), 74-78. Retrieved from <http://kns.cnki.net/KCMS/detail/detail.aspx?dbcode=CJFQ&dbname=CJFDLAST2015&filename=TALK20>

1501016&v=MDYzMjIEaDFUM3FUcldNMUZyQ1VSTEtIWitac0Z5cmdVTDNQTVN6SFpiRzRIOVRNc  
m85RVlvUjhlWDFMdXhZUzc=

- Ji, H. Y. (2005). The relationship between middle school students' self-regulated learning development and academic performance. *Journal of Chuzhou University*, 7(5), 97-100. Retrieved from <http://kns.cnki.net/KCMS/detail/detail.aspx?dbcode=CJFQ&dbname=CJFD2005&filename=CZSB200505029&v=MDc5MjJmWWJMRzRIdFRNcW85SGJZUjhlWDFMdXhZUzdEaDFUM3FUcldNMUZyQ1VSTEtIWitac0Z5cm5XN3ZKSmo=>
- Jiang, M. R., Song, H. S., & Zhang, L. (2014). Research on correlation between self-evaluation ability and academic achievement. *Journal of Kashgar Teachers College*, 35(3), 66-68. Retrieved from <http://kns.cnki.net/KCMS/detail/detail.aspx?dbcode=CJFQ&dbname=CJFD2014&filename=KSSB201403020&v=MDEwODI3WWJMRzRIOVhNckk5SFpJUjhlWDFMdXhZUzdEaDFUM3FUcldNMUZyQ1VSTEtIWitac0Z5cm5VNzdLTGo=>
- Jiang, Y. Z., & Zhang, H. Z. (2012). A correlational research of self-esteem, self-efficacy and academic performance in junior high school students. *Educational measurement and evaluation*, 2012(4), 43-50. Retrieved from <http://kns.cnki.net/KCMS/detail/detail.aspx?dbcode=CJFQ&dbname=CJFD2012&filename=PJYC201204013&v=MDI1ODk5UE1xNDIFWjRSOGVYMUx1eFITN0RoMVQzcVRyV00xRnJDVVJMS2VaK1pzRnlyblVMM0xOU2ZTYmJHNEg=>
- Jiang, B., & Tan, D. L. (2007). The effects of peer learning on academic performance and social development of junior high school students. *Journal of Tianjin Academy of Educational Science*, 2007(1), 33-35. Retrieved from <http://kns.cnki.net/KCMS/detail/detail.aspx?dbcode=CJFQ&dbname=CJFD2007&filename=TJJK200701008&v=MDM5NjViRzRIdGJNcm85RmJjUjhlWDFMdXhZUzdEaDFUM3FUcldNMUZyQ1VSTEtIWitac0Z5cm5WNzNBTVNmQlo=>
- Jiang, J. C., & Liu, H. S. (2005). Research on the relationship between the achievement goal orientation and the learning strategy & the academic performance. *Psychological Development and Education*, 2005(2), 56-61. Retrieved from <http://kns.cnki.net/KCMS/detail/detail.aspx?dbcode=CJFQ&dbname=CJFD2005&filename=XLfZ200502011&v=MDQyMjg3RGgxVDNzVHJXTTFGckNVUkxLZVOrWnNGeXJtV3IzSIBTSE5kTEc0SHRUTXJZOUVaWVI4ZVgxTHV4WVM=>
- Jiao, C. Z. (2008). Relationship of mathematic interest self-efficacy and mathematic achievement of junior school students. *Journal of Mathematics Education*, 17(2), 44-46. Retrieved from <http://kns.cnki.net/KCMS/detail/detail.aspx?dbcode=CJFQ&dbname=CJFDN0508&filename=SXYB200802011&v=MjI2NjBGckNVUkxLZVOrWnNGeXJtVkw3Tk5qWFNiTEc0SHRuTXJZOUVaWVI4ZVgxTHV4WVM3RGgxVDNzVHJXTTE=>
- Jin, G. Y., Gao, J. J., & Chen, Y. W. (2012). How learning strategy and self-efficacy predict achievement in different situations. *Journal of Zhejiang University*, 39(2), 231-238. Retrieved from <http://kns.cnki.net/KCMS/detail/detail.aspx?dbcode=CJFQ&dbname=CJFD2012&filename=HZDX201202023&v=MTY2ODc0SDIQTXXJZOUhaNFI4ZVgxTHV4WVM3RGgxVDNzVHJXTTFGckNVUkxLZVOrWnNGeXJtVtd2QkxUZlBkckc=>

- Lei, L., Wang, L., & Culjak, T. (2001). The role of goal-orientation in self-regulated learning. *Acta Psychologica Sinica*, 33(4), 349-353. Retrieved from <http://kns.cnki.net/KCMS/detail/detail.aspx?dbcode=CJFQ&dbname=CJFD2001&filename=XLXB200104010&v=MjI5OTFNcTQ5RVpJUjhlWDFMdxhZUzdEaDFUM3FUcldNMUZyQ1VSTEtIWitac0Z5cm1Vci9LUFNIVGJMRzRIdeQ=>
- Li, B., & Yang, J. L. (2004). Relations of time management disposition, self-efficiency, attribution of junior school students to academic achievement. *Psychological Exploration*, 24(4), 67-71. Retrieved from <http://kns.cnki.net/KCMS/detail/detail.aspx?dbcode=CJFQ&dbname=CJFD2004&filename=XLXT200404016&v=MjA4NzVsVmJyQIBTSFRlckc0SHRYTXE0OUVZb1I4ZVgxTHV4WVM3RGgxVDNvVHJXTTFGckNVUkxLZVwVWnNGeXI=>
- Li, Z. X., & Hu, Y. R. (2014). The relationship between goal orientation and academic achievement in junior 初 high school students: The mediation of self-efficacy. *Journal of Hubei University of Science and Technology*, 34(9), 123-125. Retrieved from <http://kns.cnki.net/KCMS/detail/detail.aspx?dbcode=CJFQ&dbname=CJFDLAST2015&filename=XNSZ201409053&v=MTc1MTh2QVBTUFlkTEc0SDIYTXBvOUFaNF14ZVgxTHV4WVM3RGgxVDNvVHJXTTFGckNVUkxLZVwVWnNGeXJnVmI=>
- Li, H. X., Lin, X., & Si, J. W. (2015). The relationship between time management disposition and academic achievement in boarding primary school students: The mediating role of self-regulate learning. *Psychological Research*, 8(6), 90-96. Retrieved from <http://kns.cnki.net/KCMS/detail/detail.aspx?dbcode=CJFQ&dbname=CJFDLAST2016&filename=OXLY201506015&v=MTc3MzdXTTFGckNVUkxLZVwVWnNGeXJsVjcvTetqWEhkN0c0SDIUTXFZOUVZWV14ZVgxTHV4WVM3RGgxVDNvVHI=>
- Li, J. D., An, M., He, T. T., & Ge, G. Y. (2009). The relationships among psychological resilience, meta-cognition, self-efficacy, test anxiety and academic performance in middle school students. *Examination Weekly*, 2009(49), 13-14. Retrieved from <http://kns.cnki.net/KCMS/detail/detail.aspx?dbcode=CFJD&dbname=CJFDN0911&filename=KDZK200949010&v=MTE5ODFyQ1VSTEtIWitac0Z5cmxVNy9MTGluUlpiRzRIIdGpJcG85RVpJUjhlWDFMdxhZUzdEaDFUM3FUcldNMUY=>
- Li, J., Zhang, J., & Zhu, L. Q. (2011). The development of middle school students' self-evaluation and its relationship with academic achievement. *Psychological Science*, 34(3), 619-624. Retrieved from <http://kns.cnki.net/KCMS/detail/detail.aspx?dbcode=CJFQ&dbname=CJFD2011&filename=XLKX201103020&v=MjcxMzQ5SFpJUjhlWDFMdxhZUzdEaDFUM3FUcldNMUZyQ1VSTEtIWitac0Z5cmtWYnZQUFNIQWRyRzRIOURNckk=>
- Li, S., & Yu, X. X. (2002). The effects of self-concept, self-monitoring and learning strategy on academic achievement in middle school students. *Journal of Ningbo University*, 24(3), 18-22. Retrieved from <http://kns.cnki.net/KCMS/detail/detail.aspx?dbcode=CJFQ&dbname=CJFD2002&filename=LBJY20020304&v=MjU1MjdTN0RoMVQzcVRyV00xRnJVVJMS2VaK1pzRnlya1Y3ekJLUy9CZDdHNEh0UE1ySTIGWUISOGVYMUx1eFk=>
- Li, X. Y., & Li, J. W. (2004). Relative study on middle school students' mathematical achievement motivation self-regulated learning and mathematical achievement. *Journal of Mathematics Education*, 13(2), 52-54. Retrieved from

<http://kns.cnki.net/KCMS/detail/detail.aspx?dbcode=CJFD&dbname=CJFDN7904&filename=SXYB200402018&v=MTM2NzN5cmtVYnJQTmpYU2JMRzRIdFhNclK5RWJJUjhlWDFMdxhZUZdEaDFUM3FUclDNMUZyQ1VSTEtWitac0Y=>

Liu, J. X., Xin, T., Huang, G. Q., & Shen, J. L. (2000). A correlational study of learning motivation, learning strategy and academic performance in middle school students. *Theory and Practice of Education*, 20(9), 54-58. Retrieved from

<http://kns.cnki.net/KCMS/detail/detail.aspx?dbcode=CJFD&dbname=CJFD2000&filename=JYLL200009011&v=MjY5MDg3RGgxVDNxVHJXTTFGckNVUkxLZVorWnNGeXJrVTd6TUx6VEhZckc0SHRITXBvOUVaWVI4ZVgxTHV4WVM=>

Liu, J. L., & Liu, S. X. (2016). The relationship between learning attitude and academic achievement of junior middle school students. *Journal of Gannan Normal University*, 2016(2), 106-109. Retrieved from

<http://kns.cnki.net/KCMS/detail/detail.aspx?dbcode=CJFQ&dbname=CJFDLAST2016&filename=GNSY201602029&v=MjU1NTc3N0xJaVBZZDdHNEg5Zk1yWTIiYlISOGVYMUx1eFITN0RoMVQzcVRyV00xRnJDVVJMS2VaK1pzRnl2aFc=>

Liu, T. (2015). On relationship between academic adaptability, academic self-efficacy and academic performance of junior middle school students. *Journal of Baicheng Normal University*, 29(6), 62-66. Retrieved from

<http://kns.cnki.net/KCMS/detail/detail.aspx?dbcode=CJFQ&dbname=CJFDLAST2015&filename=BCSF201506018&v=MTc1NzFzRnl2aFY3dktKeTdZYUxHNEg5VE1xWTIFYklSOGVYMUx1eFITN0RoMVQzcVRyV00xRnJDVVJMS2VaK1o=>

Ran, R., Huang, Y. Q., & Yu, J. (2012). The relationship between self-efficacy and academic achievement of junior high school students in the mainland Tibetan class. *Journal of Jiangsu Teachers University of Technology*, 18(1), 79-83. Retrieved from

<http://kns.cnki.net/KCMS/detail/detail.aspx?dbcode=CJFQ&dbname=CJFD2012&filename=CZJF201201020&v=MTY5ODZHNEg5UE1ybzlIWklSOGVYMUx1eFITN0RoMVQzcVRyV00xRnJDVVJMS2VaK1pzRnl2aFVickpKamZCYUw=>

Wang, J. X., & Zhang, K. (2008). Attribution, self-efficacy, examination anxiety and performance of middle school student. *Psychological Research*, 1(1), 89-91. Retrieved from

<http://kns.cnki.net/KCMS/detail/detail.aspx?dbcode=CJFQ&dbname=CJFD2008&filename=OXLY200801019&v=MDM3MTc3dk9LalhIZDdHNEh0bk1ybzIFYlISOGVYMUx1eFITN0RoMVQzcVRyV00xRnJDVVJMS2VaK1pzRnl2aFU=>

Wang, L. J. (2013). Research on the correlation among middle school students' cognitive interference, achievement goal orientation and their academic performance. *Journal of Zhongzhou University*, 30(5), 98-104. Retrieved from

<http://kns.cnki.net/KCMS/detail/detail.aspx?dbcode=CJFQ&dbname=CJFDHIS2&filename=ZOZO201305023&v=MjcwNDNVUkxLZVorWnNGeXZoVXJySVB5TFJZYkc0SDIMTXFvOUhaNFI4ZVgxTHV4WVM3RGgxVDNxVHJXTTFGckM=>

Wang, Y. X., Cao, Y. T., & Tang, X. L. (2013). Senior middle school students' academic self-efficacy and related study of its relationship with academic achievements. *Journal of Weinan Normal University*, 28(1), 141-144. Retrieved from

<http://kns.cnki.net/KCMS/detail/detail.aspx?dbcode=CJFD&dbname=CJFD2013&filename=WOLF201301032&v=MDY0MDNVUkxLZVorWnNGeXZnVTd2TU1pTEhhTEc0SDIMTXJvOUdab1I4ZVgxTHV4WV=>



M3RGgxVDNxVHJXTTFGckM=

- Wang, Y. Z., Wang, S. Z., & Ou, Y. L. (2005). A study on the relationships of academic achievements, academic self-efficacy and intrinsic motivations among middle school students in poverty-stricken areas. *Psychological Science*, 28(4), 826-829. Retrieved from <http://kns.cnki.net/KCMS/detail/detail.aspx?dbcode=CJFQ&dbname=CJFD2005&filename=XLKX200504013&v=MTcxOTZyV00xRnJDVVJMS2VaK1pzRnl2Z1Y3L0FQU0hBZHJHNEh0VE1xNDIFWjRSOGVYMUx1eFITN0RoMVQzcVQ=>
- Wei, X. C., & Zhang, Y. F. (2014). A correlational study on the relationships among self-efficacy, attribution, and Chinese academic performance in middle school students. *Research in Teaching*, 37(4), 117-120. Retrieved from <http://kns.cnki.net/KCMS/detail/detail.aspx?dbcode=CJFQ&dbname=CJFD2014&filename=JYJ201404032&v=Mjc5MDJUUpMRzRIOVhNcTQ5R1pvUjhlWDFMdxXhZUzdEaDFUM3FUclDNMUZyQ1VSTEtIWitac0Z5dm5XNy9MTHk=>
- Wu, J. Y., Hu, X. L., & Peng, J. S. (2011). Relationship between self-efficacy and academic performance of physics of senior middle school students. *Education and Teaching Research*, 25(2), 122-125. Retrieved from <http://kns.cnki.net/KCMS/detail/detail.aspx?dbcode=CFJD&dbname=CJFDN0911&filename=WUJS201106002&v=MDQyMTFNcVk5R1pvUjhlWDFMdxXhZUzdEaDFUM3FUclDNMUZyQ1VSTEtIWitac0Z5dm5WYnpJTWpqQmZiRzRIOUQ=>
- Xu, J. B. (2012). An experimental study of self-regulated learning in English reading education. *English Teaching Research and Practice in Primary and Secondary School*, 2012(3), 80-83. Retrieved from <http://kns.cnki.net/KCMS/detail/detail.aspx?dbcode=CFJD&dbname=CJFDN1214&filename=YYXS201203026&v=MDI0NTVuVXJ2QVBEVFRmYkc0SDIQTXJJOUhZb1I4ZVgxTHV4WVM3RGgxVDNxVHJXTTFGckNVUkxLZVorWnNGeXY=>
- Xu, L. L., Guo, W. (2007). The relationships among goal orientation, English learning strategies and academic performance in senior high school students. *Data of Culture and Education*, 2007(3), 146-147. Retrieved from <http://kns.cnki.net/KCMS/detail/detail.aspx?dbcode=CFJD&dbname=CJFDN0508&filename=WJZZ200703092&v=MTg0ODZHNEh0Yk1ySTINWm9SOGVYMUx1eFITN0RoMVQzcVRyV00xRnJDVVJMS2VaK1pzRnl2bVVidkJNaWZSZEW=>
- Yao, C. L. (2013). A correlational research of English learning anxiety, meta-cognition and academic performance. *Teaching Practice*, 2013(2), 54-60. Retrieved from <http://kns.cnki.net/KCMS/detail/detail.aspx?dbcode=CFJD&dbname=CJFDLASN2014&filename=XKJX201302014&v=MDg1MzQ5RVlJUjhlWDFMdxXhZUzdEaDFUM3FUclDNMUZyQ1VSTEtIWitac0Z5dm1VTDNBUFNiQmRyRzRIOUxNclk=>
- Yao, D. W., Yan, L. F., Musa, A. & Liu, G. (2011). Relationship among cognitive styles, learning motivation and strategies of junior students and the effect to school work achievement. *Psychological Research*, 4(6), 92-96. Retrieved from <http://kns.cnki.net/KCMS/detail/detail.aspx?dbcode=CJFQ&dbname=CJFD2011&filename=OXLY201106019&v=MjExNDIxTHV4WVM3RGgxVDNxVHJXTTFGckNVUkxLZVorWnNGeXZsVzd2T0tqWEhkN0c0SDIETXFZOUViWVI4ZVg=>

- Yuan, L. X. (2005). The study of relationship between achievement goals, self-efficacy, learning strategies and academic achievement. *Journal of Guangdong Education Institute*, 25(6), 58-61. Retrieved from <http://kns.cnki.net/KCMS/detail/detail.aspx?dbcode=CJFQ&dbname=CJFD2005&filename=GJXY200506013&v=MTc0OTVUcldNMUZyQ1VSTEtIWitac0Z5dmxWYnpQSWlmVGQ3RzRldFRNcVk5RVo0UjhlWDFMdXhZUzdEaDFUM3E=>
- Zhang, F., & Liu, C. (2012). Self-control of time management and academic performance of middle school students. *Psychological Research*, 5(4), 79-84. Retrieved from <http://kns.cnki.net/KCMS/detail/detail.aspx?dbcode=CJFQ&dbname=CJFD2012&filename=OXLY201204015&v=MTA4MTVFWVISOGVYMUx1eFITN0RoMVQzcVRyV00xRnJDVVJMS2VaK1pzRnl2a1Zidk1LahlIZDdHNEg5UE1xNDk=>
- Zhang, J. (2011). The relationships among English learning strategies, self-efficacy, and academic performance in senior high school students. *Journal of Basic English Education*, 13(2), 42-47. Retrieved from <http://kns.cnki.net/KCMS/detail/detail.aspx?dbcode=CJFQ&dbname=CJFD2011&filename=SDWG201102011&v=MjJwNzJGeXZrVUx2QU5pbmNhYk0SDIETXJZOUVaWVI4ZVgxTHV4WVM3RGgxVDNxVHJXTTFGckNVUkxLZVorWnM=>
- Zhang, J., Liu, J. W., & Wu, Q. L. (2012). A model of goal achievement orientation, self-efficacy, metacognition and academic performance. *Psychological Research*, 5(1), 85-88. Retrieved from <http://kns.cnki.net/KCMS/detail/detail.aspx?dbcode=CJFQ&dbname=CJFD2012&filename=OXLY201201016&v=MzA0OTNvOUVZb1I4ZVgxTHV4WVM3RGgxVDNxVHJXTTFGckNVUkxLZVorWnNGeXZrVnI3UEtqWEhkN0c0SDIQTXI=>
- Zhang, J. X., & Zhang, C. (2008). A comparative study of meta-cognition and academic performance in primary and secondary school students. *Data of Culture and Education*, 2008(4), 95-97. Retrieved from <http://kns.cnki.net/KCMS/detail/detail.aspx?dbcode=CJFQ&dbname=CJFDN0508&filename=WJZZ200811048&v=MDAxNTZyV00xRnJDVVJMS2VaK1pzRnlqafVickpNaWZSZEhHNEh0bk5ybz1CYklSOGVYMUx1eFITN0RoMVQzcVQ=>
- Zhang, L., & You, Z. Q. (2014). The effects of rural lower secondary school students' belief in a just world, gratitude and time management on their academic achievements. *Chinese Journal of Special Education*, 2014(11), 62-67. Retrieved from <http://kns.cnki.net/KCMS/detail/detail.aspx?dbcode=CJFQ&dbname=CJFDLAST2015&filename=ZDTJ201411012&v=MjU2Mjk5WE5ybz1FWm9SOGVYMUx1eFITN0RoMVQzcVRyV00xRnJDVVJMS2VaK1pzRnlqZ1dyM1BQeW5mWkxHNEg=>
- Zhang, L. H., Sun, X. J., & Feng, J. Y. (2011). The associations between monitoring, reading performance, and self-regulated learning of elementary school students. *Mental health of Primary and Secondary School*, 2011(6), 10-12. Retrieved from <http://kns.cnki.net/KCMS/detail/detail.aspx?dbcode=CFJD&dbname=CJFDN0911&filename=ZXK201111006&v=MTQxMjR1eFITN0RoMVQzcVRyV00xRnJDVVJMS2VaK1pzRnlyaFVMekJQelhUWmJHNEg5RE5ybz1GWW9SOGVYMUw=>
- Zhang, W. (2013). Related research on students' self-efficacy and mathematic achievement in the third grade of junior middle school. *Journal of Nanchang Teaching College*, 28(3), 109-110. Retrieved from <http://kns.cnki.net/KCMS/detail/detail.aspx?dbcode=CJFQ&dbname=CJFD2013&filename=LCYY201303070&v=MDU3MjV4WVM3RGgxVDNxVHJXTTFGckNVUkxLZVorWnNGeWpnVjd2SktTN1NkN0c0S>

DIMTXJJOUNaSVI4ZVgxTHU=

Zhang, W. H., & Shen, J. L. (2006). A study on the relationship between middle school students' academic stress, achievement goal orientation and academic achievement. *Journal of Southwest China Normal University*, 32(6), 95-98. Retrieved from

<http://kns.cnki.net/KCMS/detail/detail.aspx?dbcode=CJFQ&dbname=CJFD2006&filename=XBSW200606019&v=MDU2NTBmTXFZOUViWVI4ZVgxTHV4WVM3RGgxVDNxBHJXTTFGckNVUkxLZVorWnNGeWpnVWJ2SVBTL1IIYkc0SHQ=>

Zhang, X. H., & Gao, C. Y. (2010). A correlational study of gender difference, meta-cognition and English listening performance. *Overseas English*, 2010(8), 339-340. Retrieved from

<http://kns.cnki.net/KCMS/detail/detail.aspx?dbcode=CJFQ&dbname=CJFD2010&filename=HWYY201008157&v=MjI1OTdXTTFGckNVUkxLZVorWnNGeWpnVTczQUxUcINkN0c0SDIITXA0NUFZNF14ZVgxTHV4WVM3RGgxVDNxBHI=>

Zhang, X. X., & Yang, Y. X. (2012). A correlational study of junior high school students' self-esteem, achievement goal and academic performance. *Education Forum*, 2012(10), 155-156. Retrieved from

<http://kns.cnki.net/KCMS/detail/detail.aspx?dbcode=CJFU&dbname=CJFDN1214&filename=JTDS201210116&v=MjM2NDViRzRlOVBOcjQ1RV1vUjhlWDFMdxhZUZdEaDFUM3FUcldNMUZyQ1VSTEtIWitac0Z5am5WYnJLTHpuUGY=>

Zhang, Y., & Li, Q. W. (2010). The relationships of junior high school students' teacher-student relationships, attribution style and achievement goal orientation with academic achievement. *Psychological Science*, 33(4), 785-788. Retrieved from

<http://kns.cnki.net/KCMS/detail/detail.aspx?dbcode=CJFQ&dbname=CJFD2010&filename=XLKX201004006&v=MTMyNjBQU0hBZHJHNEg5SE1xNDIGWW9SOGVYMUx1eFITN0RoMVQzcvRyV00xRnJDVVJMS2VaK1pzRnlqblZML0w=>

Zhang, Y. F., Wei, X. C., & He, H. (2014). A comparative study of attribution style and academic performance in senior high school students. *Educational Practice and Research*, 2014(11), 5-9. Retrieved from

<http://kns.cnki.net/KCMS/detail/detail.aspx?dbcode=CJFQ&dbname=CJFDLAST2015&filename=JYSJ201411003&v=MzI3NTINTHpUWVpMRzRlOVhOcm85Rl0UjhlWDFMdxhZUZdEaDFUM3FUcldNMUZyQ1VSTEtIWitac0Z5am5Wcno=>

Zhou, L. H., & Liu, Y. (2012). The impact factors of physic academic performance of senior high school students. *The Physical Education Research and Curriculum Theory*, 2012(3), 105-107. Retrieved from

<http://kns.cnki.net/KCMS/detail/detail.aspx?dbcode=CFJD&dbname=CJFDN1214&filename=WLTB201203041&v=MjY1NTkxRnJDVVJMS2VaK1pzRnlqblU3ckxNaUhmYkxHNEg5UE1ySTICWlISOGVYMUx1eFITN0RoMVQzcvRyV00=>
